# Supplementary material
Source: PubMed Central journal article supplement (PMC3876210)
Supplement: 1320208110_pnas.201320208SI.pdf [file 1320208110_pnas.201320208SI.pdf]

# Supporting Information

Azanchi et al. 10.1073/pnas.1320208110

## SI Materials and Methods

**Six-Choice Oviposition Assay.** Six-choice oviposition assays were performed like two-choice oviposition assays with the exception of food preparation. Food substrate was made by mixing the appropriate volume of ethanol or water into molten fly food cooled to 50 °C. Food was poured into 35-mm Petri dishes and then separated into six equal sections. Sections of different concentrations of ethanol were fitted next to each other into 35-mm Petri dishes, and assay was performed as per two-choice oviposition assay. Oviposition index was calculated as number of eggs laid on  $\times$  percentage of food/number of total eggs.

**Two-Choice Position Assay.** Food substrate was made, and flies were collected and treated as described in two-choice oviposition assay above. For position analysis, the two-choice plate was placed in the center of a 60-mm Petri dish. Flies were gently added and the clear plastic 60-mm Petri dish was placed over the top. Flies were filmed using infrared light in the dark at 25 °C for 3 h using a Sony NightShot 0 Lux Digital Handicam. The position of the flies and

eggs was recorded every minute and later grouped into 10-min intervals.

**Immunohistochemistry.** Four-day-old adult female brains were dissected in a PBS solution and fixed for 45 min at room temperature with 4% (vol/vol) formaldehyde. Tissue was left overnight at 4 °C with 1:500 rabbit anti-tyrosine hydroxylase (TH), 1:200 goat rabbit anti-GFP (Invitrogen Molecular Probes), 1:200 mouse anti-CD8 (Invitrogen Molecular Probes), or 1:50 goat anti-mouse nc82 (The Jackson Laboratory), washed four times, and left overnight in 1:500 Alexa-Fluor 594 goat anti-mouse (Invitrogen Molecular Probes) or 1:200 Alexa-Fluor 488 goat anti-rabbit (Invitrogen Molecular Probes). Brains were mounted in Fluoromount-G (Southern Biotech). Samples were imaged using a Zeiss LSM 710 (Janelia Farm Research Campus Imaging Center). Images were acquired using a 20 $\times$  objective and scanned at a resolution of 1024  $\times$  1024 pixels. Adobe Photoshop CS and Illustrator were used to tile images.

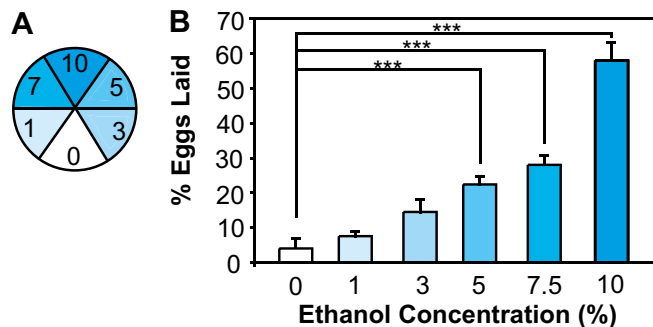

**Fig. S1.** Oviposition preference for higher concentrations of ethanol in a six-choice test. (A) Flies were given a choice between six different ethanol concentrations ranging from 1% to 10% in a “pie” orientation. (B) There was a dose-dependent preference for ethanol when flies were given a choice between six different ethanol concentrations with the highest number of eggs being laid on 10% ethanol and lowest number of eggs on 0% ethanol [ $n = 27$  per group; ANOVA:  $F_{(5,161)} = 50.47$ ,  $P < 0.0001$ ; Tukey’s post hoc: 0% vs. 1%,  $P = 0.94$ ; 0% vs. 3%,  $P = 0.08$ ; 0% vs. 5%, 7.5%, or 10%,  $P < 0.0001$ ].

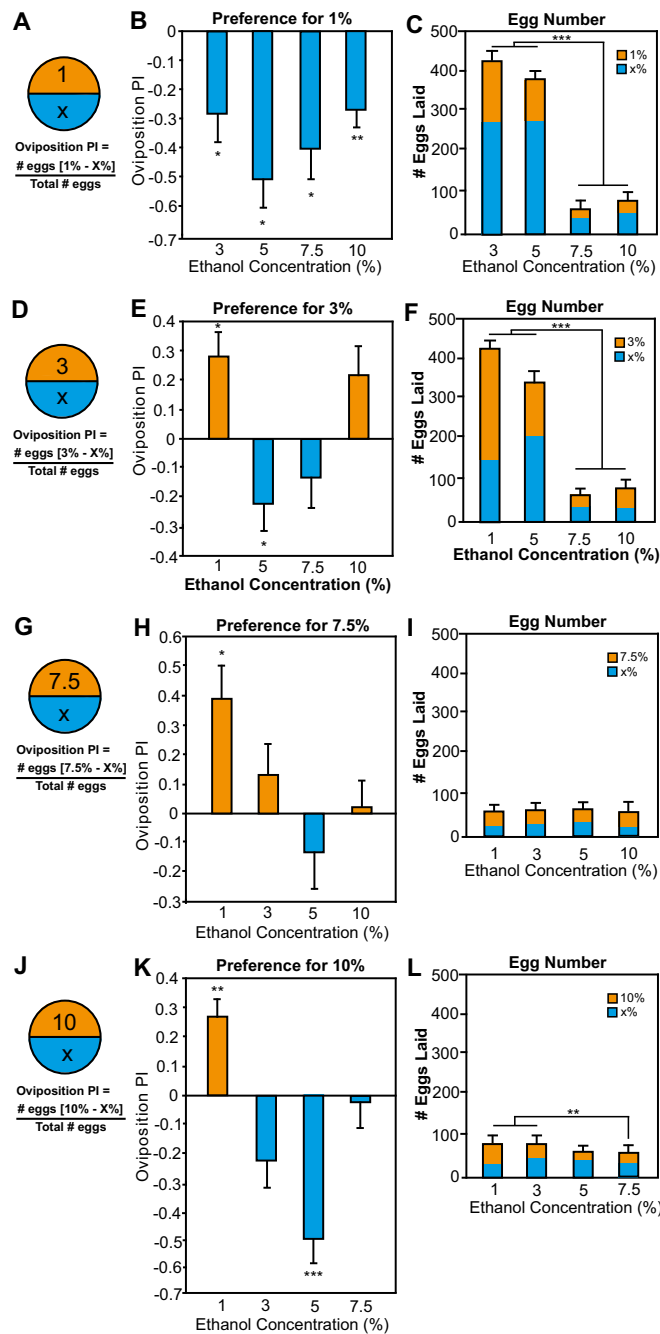

**Fig. S2.** Flies prefer to lay eggs on concentrations of 5% ethanol in a forced choice between concentrations. (A, D, G, and J) Oviposition preference index (PI) was calculated by subtracting the number of eggs on the stated (X) concentration of food from the number of eggs on 1% (A), 3% (D), 7.5% (G), and 10% (J) ethanol-food respectively and dividing by the total number of eggs. (B) Flies preferred to lay their eggs on 3%, 5%, 7.5%, or 10% ethanol food compared with 1% ethanol food [Wilcoxon PI against zero: 3%,  $\chi^2_{(1,8)} = 6.05$ ,  $P = 0.01$ ; 5%,  $\chi^2_{(1,8)} = 6.05$ ,  $P = 0.01$ ; 7.5%,  $\chi^2_{(1,12)} = 4.93$ ,  $P = 0.03$ ; 10%,  $\chi^2_{(1,28)} = 7.56$ ,  $P = 0.006$ ]. (C) The number of eggs laid on ethanol concentrations under 5% was significantly greater than the number of eggs laid on ethanol concentrations over 5% [ANOVA:  $F_{(3,35)} = 277.86$ ,  $P < 0.0001$ ; Tukey's post hoc comparisons: 1%:3% vs. 1%:7.5%,  $P < 0.0001$ ; 1%:3% vs. 1%:10%,  $P < 0.0001$ ; 1%:5% vs. 1%:7.5%,  $P < 0.0001$ ; 1%:5% vs. 1%:10%,  $P < 0.0001$ ]. (E) Flies laid significantly more eggs on 3% ethanol food compared with 1% ethanol food but not compared with 5%, 7.5%, or 10% ethanol food [Wilcoxon PI against zero: 1%,  $\chi^2_{(1,8)} = 6.05$ ,  $P = 0.01$ ; 5%,  $\chi^2_{(1,8)} = 6.05$ ,  $P = 0.01$ ; 7.5%,  $\chi^2_{(1,26)} = 3.17$ ,  $P = 0.07$ ; 10%,  $\chi^2_{(1,20)} = 2.61$ ,  $P = 0.11$ ]. (F) The number of eggs laid on ethanol concentrations under 5% was significantly greater than the number of eggs laid on ethanol concentrations over 5% [ANOVA:  $F_{(3,27)} = 219.83$ ,  $P < 0.0001$ ; Tukey's post hoc comparisons: 1%:3% vs. 3%:7.5%,  $P < 0.0001$ ; 1%:3% vs. 3%:10%,  $P < 0.0001$ ; 3%:5% vs. 3%:7.5%,  $P < 0.0001$ ; 3%:5% vs. 3%:10%,  $P < 0.0001$ ]. (H) Flies laid significantly more eggs on 7.5% ethanol food compared with 1% ethanol food but not 3%, 5%, or 10% ethanol food [Wilcoxon PI against zero: 1%,  $\chi^2_{(1,12)} = 4.93$ ,  $P = 0.03$ ; 3%,  $\chi^2_{(1,26)} = 3.17$ ,  $P = 0.07$ ; 5%,  $\chi^2_{(1,24)} = 0.55$ ,  $P = 0.46$ ; 10%,  $\chi^2_{(1,23)} = 0.16$ ,  $P = 0.69$ ]. (I) There were no significant differences in the number of eggs laid on any of the plates containing 7.5% ethanol [ANOVA:  $F_{(3,45)} = 0.83$ ,  $P = 0.49$ ]. (K) Flies laid significantly more eggs on 10% ethanol food compared with 1% ethanol food but not 3% or 10% ethanol food [Wilcoxon PI against zero: 1%,  $\chi^2_{(1,28)} = 7.56$ ,  $P = 0.006$ ; 3%,  $\chi^2_{(1,20)} = 2.61$ ,  $P = 0.11$ ; 10%,  $\chi^2_{(1,23)} = 0.16$ ,  $P = 0.69$ ]. Flies laid significantly less eggs on 10% ethanol food compared with 5% ethanol food [ $\chi^2_{(1,22)} = 18.67$ ,  $P < 0.0001$ ]. (L) Flies laid significantly less eggs on food containing 7.5% ethanol [ANOVA:  $F_{(3,41)} = 9.01$ ,  $P < 0.0001$ ; Tukey's post hoc comparisons: 1%:10% vs. 7.5%:10%,  $P = 0.0002$ ; 3%:10% vs. 7.5%:10%,  $P = 0.0009$ ]. Bars on graphs represent means  $\pm$  SEM. \* $P < 0.05$ ; \*\* $P < 0.001$ ; \*\*\* $P < 0.0001$ .





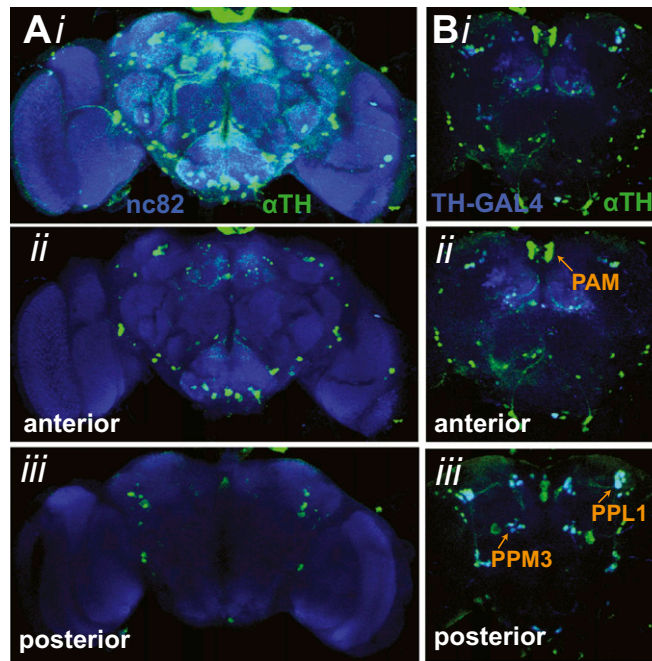

**Fig. S5.** TH and *TH-GAL4* expression in the adult brain. (A) Expression of TH in the adult brain ( $\alpha$ TH, green; nc82, blue). TH is expressed in  $\sim$ 282 neurons organized into 13 clusters of neurons in the protocerebrum (1, 2). (A, *i–A, iii*) Confocal stacks of the entire brain (A, *i*), anterior part of the brain (A, *ii*), and posterior part of the brain (A, *iii*). (B) Comparison between *TH-GAL4* and  $\alpha$ TH staining in the central brain ( $\alpha$ TH, green;  $\alpha$ GFP representing *TH-GAL4* expression, blue). There are  $\sim$ 127 *TH-GAL4*-expressing neurons that can be categorized into 13 different clusters in the brain (1). Five of these clusters show complete expression overlap between *TH-GAL4* and  $\alpha$ TH, including the PPL1 and PPM3 neurons (1). Notably, fewer PAM cells are expressed in the *TH-GAL4* pattern compared with the  $\alpha$ TH pattern (B, *i*). (B, *i–B, iii*) Confocal stacks of the entire central brain (B, *i*), anterior part of the brain (B, *ii*), and posterior part of the brain (B, *iii*). Clusters of dopaminergic neurons are named based on their location in the brain: PAM, protocerebral anterior median; PPL, protocerebral posterior lateral; PPM, protocerebral posterior median.

1. Mao Z, Davis RL (2009) Eight different types of dopaminergic neurons innervate the *Drosophila* mushroom body neuropil: Anatomical and physiological heterogeneity. *Front Neural Circuits* 3:5.
2. Nässel DR, Elekes K (1992) Aminergic neurons in the brain of blowflies and *Drosophila*: Dopamine- and tyrosine hydroxylase-immunoreactive neurons and their relationship with putative histaminergic neurons. *Cell Tissue Res* 267(1):147–167.

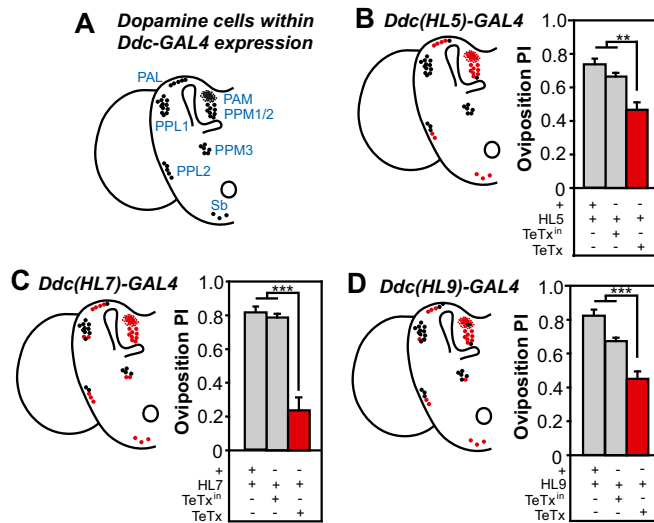

**Fig. 56.** Dopaminergic neurons affect oviposition preference. (A) Schematic showing dopamine-expressing cell bodies within the *Ddc-GAL4* expression pattern. Red neurons in schematics *B–D* represent neurons expressed within each respective *GAL4* driver. Black neurons in schematics *B–D* represent other neurons within the *Ddc-GAL4* expression pattern that are not expressed. Nondopaminergic expression is omitted in the schematics. (B) We found that disrupting neurotransmission in PAM, PAL, PPM1/2, PPL2, and Sb neurons (1, 2) decreased oviposition preference for ethanol [ $n = 14–19$  per strain; ANOVA:  $F_{(2,49)} = 19.39$ ,  $P < 0.0001$ ; Tukey's post hoc:  $+IHL5$  vs.  $TeTx/IHL5$ ,  $P < 0.0001$ ;  $TeTx^{in}/IHL5$  vs.  $TeTx/IHL5$ ,  $P = 0.0002$ ]. (C and D) Disrupting neurotransmission in PAM neurons, and subsets of PAL, PPM1/2, PPM3, PPL2, PPL1, and Sb neurons (1–3), decreased oviposition preference for ethanol [ $HL7$ :  $n = 15–21$  per strain; ANOVA:  $F_{(2,48)} = 40.81$ ,  $P < 0.0001$ ; Tukey's post hoc:  $+IHL7$  vs.  $TeTx/IHL7$ ,  $P < 0.0001$ ;  $TeTx^{in}/IHL7$  vs.  $TeTx/IHL7$ ,  $P < 0.0001$ ;  $HL9$ :  $n = 15–19$  per strain; ANOVA:  $F_{(2,50)} = 33.57$ ,  $P < 0.0001$ ; Tukey's post hoc:  $+IHL9$  vs.  $TeTx/IHL9$ ,  $P < 0.0001$ ;  $TeTx^{in}/IHL9$  vs.  $TeTx/IHL9$ ,  $P < 0.0001$ ]. Bars on graphs represent means  $\pm$  SEM. \* $P < 0.05$ ; \*\* $P < 0.001$ ; \*\*\* $P < 0.0001$ . Clusters of dopaminergic neurons are named based on their location in the brain: PAL, protocerebral anterior lateral; Sb, subesophageal ganglion.

- Li H, Chaney S, Roberts IJ, Forte M, Hirsh J (2000) Ectopic G-protein expression in dopamine and serotonin neurons blocks cocaine sensitization in *Drosophila melanogaster*. *Curr Biol* 10(4):211–214.
- Kong EC, et al. (2010) A pair of dopamine neurons target the D1-like dopamine receptor DopR in the central complex to promote ethanol-stimulated locomotion in *Drosophila*. *PLoS ONE* 5(4):e9954.
- Claridge-Chang A, et al. (2009) Writing memories with light-addressable reinforcement circuitry. *Cell* 139(2):405–415.

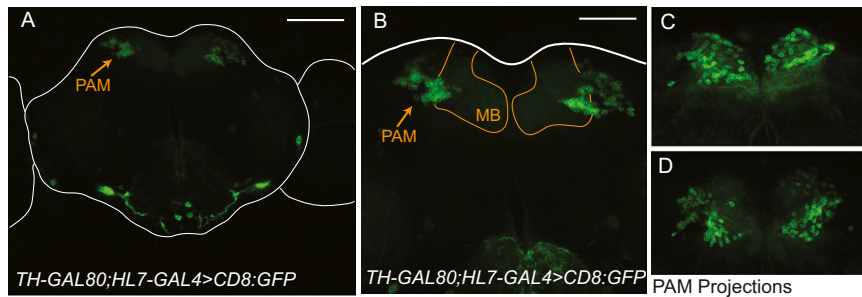

**Fig. 57.** Expression of PAM and PPL1 *GAL4* lines. (A and B) Expression of GFP (using *UAS-CD8:GFP*) in *HL7*-expressing neurons that do not also express *TH* (*HL7-GAL4;TH-GAL80*) (MB, mushroom body; green, *CD8:GFP*). (B) Higher-magnification view of a section of A. (C and D) Projections from the PAM neurons leading to the horizontal lobes of the MB (flies of genotype *TH-GAL80;HL7-GAL4 > CD8:GFP*; green, anti-GFP).

**Table S1. Expression of Dopaminergic GAL4 lines**

| GAL4 lines              | Dopaminergic neurons |      |      |        |      |     |        |
|-------------------------|----------------------|------|------|--------|------|-----|--------|
|                         | Ovi pref             | PPL1 | PPL2 | PPM1/2 | PPM3 | PAM | PAL Sb |
| <i>Ddc</i>              | Decrease             | +    | +    | +      | +    | +   | +      |
| <i>TH</i>               | Increase             | +    | +    | +      | +    | —   | +      |
| <i>Ddc (HL5)</i>        | Decrease             | —    | +    | +      | —    | +   | +      |
| <i>Ddc (HL7)</i>        | Decrease             | +    | +    | +      | +    | +   | +      |
| <i>Ddc (HL9)</i>        | Decrease             | +    | +    | +      | +    | +   | +      |
| <i>Ddc(HL7);THGAL80</i> | Decrease             | —    | —    | —      | —    | +   | —      |
| <i>NP2758</i>           | Increase             | +    | —    | —      | —    | —   | —      |
| <i>kra;MBGAL80</i>      | Increase             | +    | —    | —      | —    | —   | —      |
| <i>C346; MBGAL80</i>    | Decrease             | —    | —    | —      | +    | —   | —      |

Ovi pref, oviposition preference. Dashes indicate lack of expression.

**Table S2. Number of eggs laid during oviposition preference experiments**

| GAL4 lines              | +GAL4    | <i>UAS-TeTx<sup>h</sup></i> /GAL4 | <i>UAS-TeTx</i> /GAL4 |
|-------------------------|----------|-----------------------------------|-----------------------|
| <i>Ddc</i>              | 289 ± 26 | 85 ± 20                           | 30 ± 3                |
| <i>TH</i>               | 260 ± 27 | 153 ± 28                          | 174 ± 23              |
| <i>TRH</i>              | 215 ± 14 | 273 ± 19                          | 68 ± 16               |
| <i>Ddc (HL5)</i>        | 213 ± 19 | 167 ± 37                          | 69 ± 17               |
| <i>Ddc (HL7)</i>        | 307 ± 24 | 69 ± 6                            | 26 ± 4                |
| <i>Ddc (HL9)</i>        | 226 ± 23 | 191 ± 9                           | 49 ± 6                |
| <i>Ddc(HL7);THGAL80</i> | 297 ± 12 | 141 ± 27*                         | 119 ± 16              |
| <i>NP2758</i>           | 309 ± 26 | 92 ± 8                            | 65 ± 5                |
| <i>kra;MBGAL80</i>      | 192 ± 10 | 127 ± 18                          | 37 ± 6                |
| <i>C346</i>             | 269 ± 23 | 151 ± 15                          | 69 ± 9                |
| <i>MB247</i>            | 151 ± 22 | 54 ± 8                            | 55 ± 13               |
| <i>NP65</i>             | 190 ± 19 | 169 ± 25                          | 44 ± 7                |
| <i>4-59</i>             | 171 ± 27 | 83 ± 11                           | 57 ± 12               |
| <i>2-72</i>             | 234 ± 12 | 109 ± 23                          | 31 ± 6                |
| <i>11-27</i>            | 216 ± 21 | 68 ± 3                            | 46 ± 5                |
| <i>4-67</i>             | 182 ± 33 | 99 ± 9                            | 67 ± 7                |
| <i>C232</i>             | 196 ± 26 | 125 ± 21                          | 27 ± 5                |

Numbers represent means ± SEM. Statistical comparison defined by an ANOVA between +GAL4, *UAS-TeTx<sup>h</sup>*/GAL4, and *UAS-TeTx*/GAL4 is represented by black ( $P > 0.05$ ) and red ( $P < 0.05$ ).

\*Tested line: +/TH-GAL80, *UAS-TeTx*.
